# Supplementary material for: Impact of Life Kinetik Training on Balance, Agility, Jumping, Proprioception, and Cognitive Function in Preadolescent Recreational Fencing Athletes: A Randomized Controlled Trial
Source: Research Square preprint supplement (doi:10.21203/rs.3.rs-5463104/v1), 2025-04-25
Supplement: Supplementary file 1 [file f891c603cd4afab2ba9b8d04.docx]

# Appendix 1. Life Kinetic Intervention: Sample Exercises and Weekly Progression Plan

This appendix provides sample exercises from each of the seven modules of the Life Kinetic intervention program, along with their targeted cognitive and motor functions, equipment used, and weekly progression overview. A complete list of all exercises implemented throughout the intervention is available from the authors upon request.

## Sample Exercises from Core Modules

| Module | Exercise Example | Targeted Skills | Equipment |
| --- | --- | --- | --- |
| Balance and Coordination | Single-leg stance while tossing a ball | Static balance, hand-eye coordination, attention | Soft ball, balance pad (optional) |
| Balance and Coordination | Ladder stepping with cognitive cues | Dynamic balance, motor planning, divided attention | Agility ladder, color cards |
| Reaction Time | Catching a dropped reaction stick | Visual processing, reaction speed | Ruler or reaction stick |
| Reaction Time | Sprint to cone based on light signal | Visual cue response, agility | LED lights, colored cones |
| Decision-Making | Dual command game (color + number combo) | Cognitive flexibility, task switching | Color cards, number list |
| Decision-Making | Ball dribble with directional decision | Response selection, spatial awareness | Ball, cones |
| Memory Tasks | Memory card matching with shuttle run | Working memory, spatial recall | Memory cards, markers |
| Memory Tasks | Number sequence tracking with movement | Sequential recall, dual-tasking | Number cards |
| Rhythm Exercises | Step-clap routine with metronome | Auditory-motor synchronization | Metronome or rhythm app |
| Mirror Exercises | Leader-follower movement imitation | Motor imitation, visual tracking | None |
| Color/Direction Change | Sprint to color-coded cones | Perceptual reaction, agility | Colored cones |
| Color/Direction Change | Mixed signal running path | Inhibitory control, spatial response | Color and shape cards |

## Weekly Progression Strategy

| Weeks | Focus | Progression Description |
| --- | --- | --- |
| 1–2 | Introduction | Simple, single-task exercises; familiarization with structure and tools. |
| 3–4 | Cognitive Load Increase | Addition of dual-task activities and simple decision-making. |
| 5–6 | Complexity and Speed | Tasks with increased rules, faster cues, multitasking challenges. |
| 7–8 | Mastery and Integration | Highest difficulty level, cross-module combinations, timed decisions. |

# Appendix 2. CERT (Consensus on Exercise Reporting Template)

| **CERT Item** | **Description** |
| --- | --- |
| 1. Type of exercise | The intervention involved a multimodal cognitive-motor coordination training based on the Life Kinetic concept. It integrated tasks from seven modules: balance and coordination, reaction time, decision-making, memory tasks, rhythm exercises, mirror exercises, and color-direction changes. Exercises were designed to stimulate both motor coordination and cognitive functions simultaneously. |
| 2. Detailed description of exercises | Each session included 5–8 structured exercises selected from different modules. Tasks such as single-leg balance with ball throws, light reaction drills, Stroop-based running games, rhythm patterns, mirror mimicking, and memory-based movement tasks were performed. A wide variety of equipment (e.g., balls, cones, ladders, colored cards, memory cards) was used. |
| 3. Individual vs. group exercises | Exercises were conducted in small groups of 5–10 participants under the supervision of a certified trainer. Some activities were performed individually, while others involved pairs or the entire group for synchronized movement or interaction. |
| 4. Exercise setting | All sessions were held in an indoor sports hall with adequate lighting, non-slip flooring, and sufficient space for dynamic movement. Equipment was arranged before each session in a standardized manner to ensure consistency. |
| 5. Supervision and instructor qualifications | Sessions were delivered face-to-face by certified coaches who had received specific training in the Life Kinetic method. All sessions were supervised to ensure adherence to the protocol and safety during performance. |
| 6. Exercise frequency and schedule | Participants engaged in two 60-minute sessions per week (e.g., Mondays and Wednesdays), for a total of 8 weeks and 16 sessions. A minimum of one day was left between sessions to allow for recovery. |
| 7. Session structure | Each session consisted of a 5–10 min warm-up, a ~45-minute main exercise section covering different modules, and a 5-minute cool-down with stretching. Tasks were rotated to maintain variety and engagement. |
| 8. Intensity | Physical intensity was low to moderate (RPE 3–5/10), while cognitive load was high due to multitasking demands. Rest breaks were included as needed to manage mental fatigue. |
| 9. Exercise duration and repetitions | Exercises were time-based rather than repetition-based. Each task lasted about 5–10 minutes. Performance progression was based on success rate (e.g., moving to a harder variant after 30–40% success). Each session included 5–8 different tasks. |
| 10. Progression and advancement | Task difficulty increased every 2 weeks (basic, moderate, advanced, complex stages). Progression involved faster cues, more complex rules, increased multitasking, or higher cognitive load. Individual adaptations were made based on each participant's performance. |
| 11. Tailoring | Exercises were modified according to participants’ abilities. For example, balance tasks could be performed with support if needed, or made more difficult for advanced participants (e.g., eyes closed). The core principles remained consistent across variations. |
| 12. Adherence and attendance | Attendance was recorded at each session. Participants were encouraged to attend at least 85% of sessions. Absences were noted, and motivational strategies such as gamified tasks, feedback, and variety were used to support adherence. |
| 13. Concomitant activities | Participants were instructed not to engage in any additional structured cognitive or physical training programs during the intervention period. Usual daily activity was permitted. |
| 14. Feedback and communication | Real-time feedback was given during sessions by the trainer. Weekly check-ins were conducted, and session logs were kept. Trainers also met regularly to maintain protocol fidelity and adjust task delivery if needed. |
| 15. Safety | All sessions began with warm-up and ended with cool-down exercises to reduce injury risk. Equipment was checked regularly. Participants were advised to report discomfort or pain immediately. No adverse events were recorded. |
| 16. Outcome assement | Pre- and post-intervention testing was conducted by blinded assessors using standardized cognitive and motor tests (e.g., balance, agility, reaction time, memory tasks). Observational notes were also kept by the trainer to monitor behavioral changes. |
